# Supplementary material for: Performance bounds and perspective for hybrid solar photovoltaic/thermal electricity-generation strategies
Source: Royal Society of Chemistry journal article supplement (doi:10.1039/c8se00046h), 2018-01-01
Supplement: c8se00046h1.pdf [file c8se00046h1.pdf]

## SUPPLEMENTARY MATERIAL

The photon flux emitted by a blackbody of temperature  $T$  over the restricted energy range from  $E_i$  to  $E_j$  is

$$N(E_i, E_j, T, \mu, \theta) = \theta \frac{2\pi}{h^3 c^2} \int_{E_i}^{E_j} \frac{E^2}{\exp\left(\frac{E - \mu}{kT}\right) - 1} dE \quad (S1)$$

where  $h$  is Planck's constant,  $c$  is the speed of light,  $k$  is Boltzmann's constant,  $\theta$  is the projected solid angle subtended by the radiation source, and  $\mu$  is chemical potential. The maximum current ( $I$ ) extractable from a PV cell is the difference between the current pumped to the conduction band by photon absorption, and the current associated with luminescent emission:

$$I/q = \dot{N}_S - \dot{N}_R = aN(E_g, \infty, T_S, 0, \theta_S) - \varepsilon N(E_g, \infty, T_c, qV, \theta_{em}) \quad (S2)$$

where  $q$  is the elementary charge,  $\dot{N}_S$  and  $\dot{N}_R$  are the current contributions associated with photon absorption and emission,  $a$  and  $\varepsilon$  are the absorptivity and emissivity of the cell,  $E_g$  is the bandgap energy,  $T_S$  and  $T_c$  are the respective temperatures of the sun and the cell,  $V$  is the applied voltage, and  $\theta_S$  and  $\theta_{em}$  are, respectively, the projected solid angles subtended by the sun and cell emission (with the contribution of the background blackbody radiation from the environment being neglected here).

In the radiative limit<sup>S1</sup>

$$\eta_{PV} = \frac{\{qV[N_S(\mu = 0) - N_R(\mu = qV)]\}_{max}}{P_{in}} \quad (S3)$$

where  $P_{in}$  is the incident solar flux, and the radiative limit refers to

1. each absorbed photon generating one and only one electron-hole pair,
2. no absorption of sub-bandgap photons,
3. the only loss mechanism being radiative recombination,
4. negligible resistive losses, and
5. the cell being maintained at ambient temperature (taken here as 300K).

S1 A. S. Brown and M. A. Green, *Prog. Photovolt: Res. Appl.*, 2002, **10**, 299-30.
